# Supplementary figures and images for: Duration and Time Trends in Hospital Stay for Very Preterm Infants Differ Across European Regions*
Source: PubMed Central journal article supplement — Pediatr Crit Care Med. 2018 Dec 5;19(12):1153–61. doi: 10.1097/PCC.0000000000001756 (PMC6282674; doi:10.1097/pcc.0000000000001756), 2018-12-05

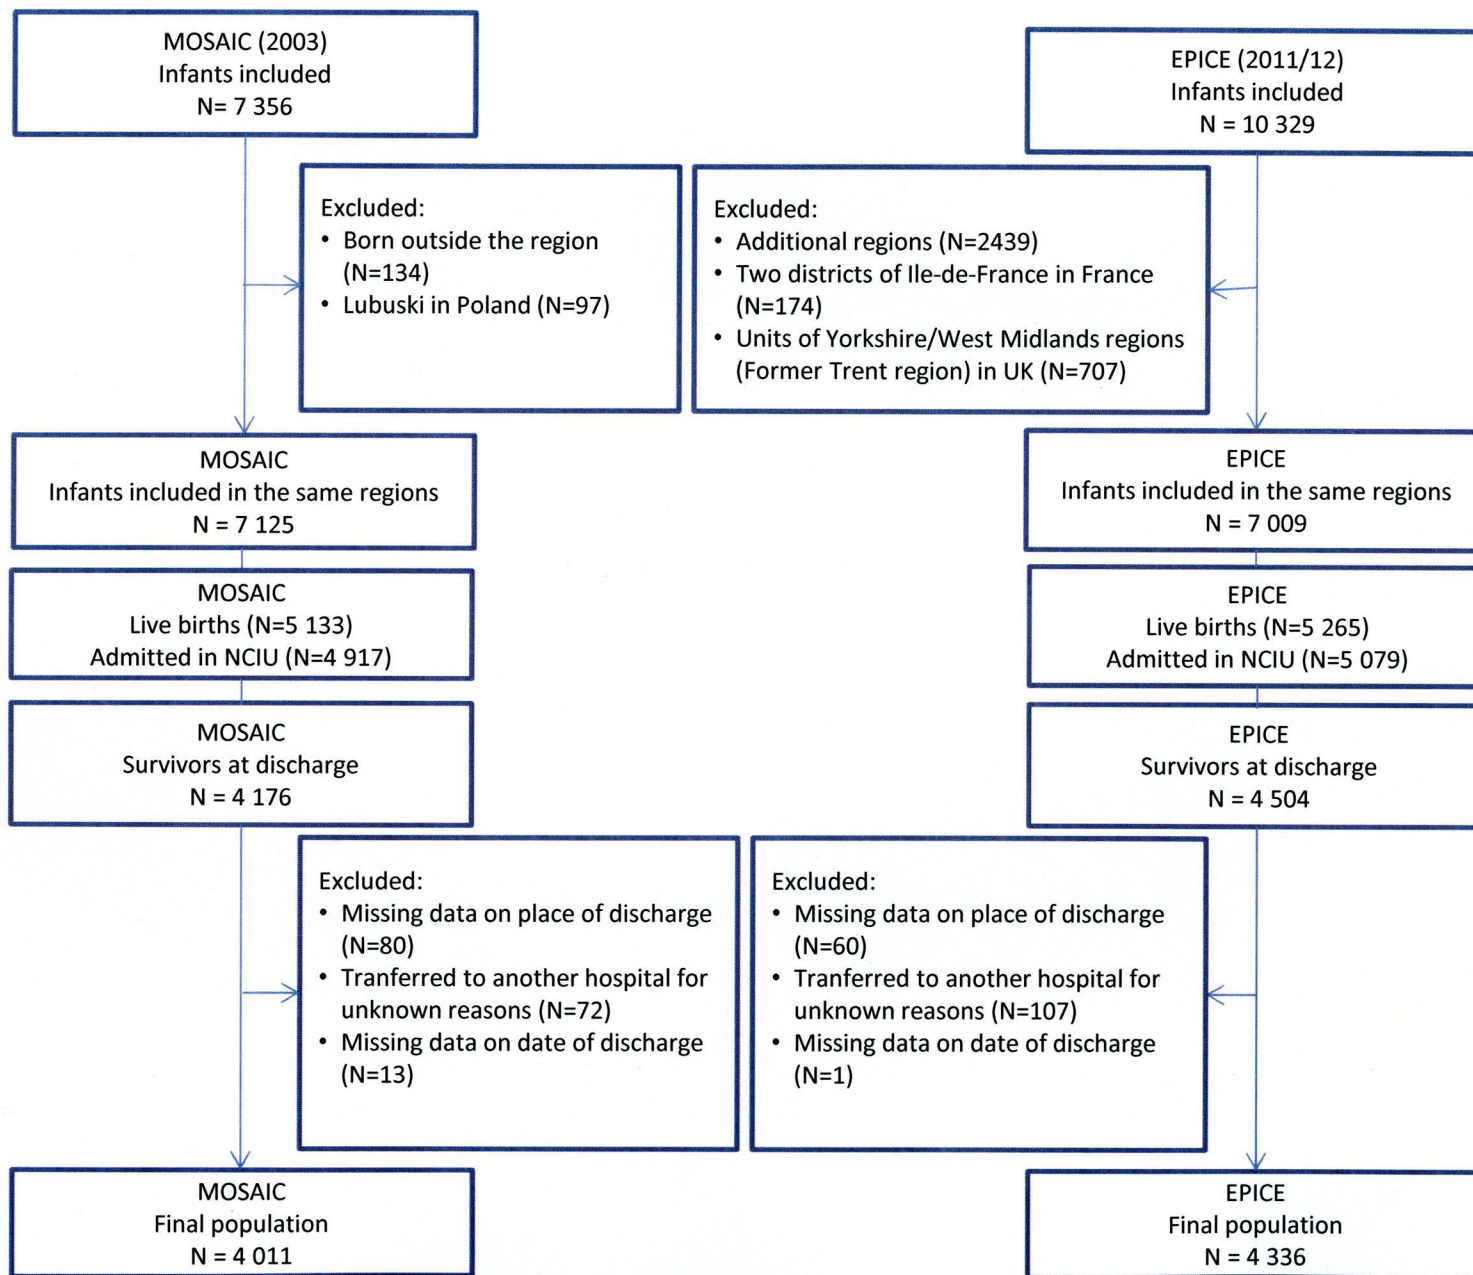

Supplement: pcc-19-1153-s001.pdf [file pcc-19-1153-s001.pdf]
